# Supplementary material for: Social capital, health status, and sociodemographic factors associated with subjective well-being among older Adults: a comparative study of community dwellings and nursing homes
Source: Research Square preprint supplement (doi:10.21203/rs.3.rs-5391128/v1), 2024-12-02
Supplement: Supplementary file 1 [file 015478622576249183cb9b58.docx]

**Additional file**

**Table S1.** SWB dimensions of the matched samples

| **Variable** | **Community dwellings (n = 290)** | **Nursing homes (n = 290)** | **Differences between two groups** |
| --- | --- | --- | --- |
| **Mean (SD) / N (%)** | **Mean (SD) / N (%)** | **t / U value** |
| SWB dimensions |  |  |  |
| PA | 7.3 (2.5) | 5.0 (3.0) | *U* = -9.341*** |
| PE | 10.4 (3.2) | 8.4 (3.3) | *t* = 7.399*** |
| NA | 2.5 (2.9) | 2.7 (2.4 ) | *U* = -2.235* |
| NE | 3.6 (3.8) | 3.8 (3.0) | *U* = -2.347* |

SD=Standard deviation; Student t-tests or Mann-Whitney U-tests were used to compare differences in SWB dimensions between the matched samples; **p* < 0.05, ***p* < 0.01, ****p* < 0.001.
