# Supplementary material for: Social capital, health status, and sociodemographic factors associated with subjective well-being among older Adults: a comparative study of community dwellings and nursing homes
Source: Research Square preprint supplement (doi:10.21203/rs.3.rs-5391128/v1), 2024-12-02
Supplement: Supplementary file 2 [file 807d749504a084a96aa0e923.docx]

**Additional file**

**Table S2.** Associations between social participation and SWB dimensions among older adults in community dwellings

| **Variable** | **(1)** | **(2)** | **(3)** | **(4)** | **(5)** | **(6)** |
| --- | --- | --- | --- | --- | --- | --- |
| 1. Social participation | 1 |  |  |  |  |  |
| 1. PA | .064 | 1 |  |  |  |  |
| 1. PE | .071 | .588** | 1 |  |  |  |
| (4) NA | .223** | -.333** | -.255** | 1 |  |  |
| (5) NE | .261** | -.343** | -.239** | .757** | 1 |  |
| (6) SWB | -.133* | .713** | .678** | -.792** | -.815** | 1 |

**p* < 0.05, ***p* < 0.01, ****p* < 0.001.
